# Supplementary material for: Stiffening of DU145 prostate cancer cells driven by actin filaments – microtubule crosstalk conferring resistance to microtubule-targeting drugs
Source: Royal Society of Chemistry journal article supplement (doi:10.1039/d0nr06464e), 2021-01-01
Supplement: d0nr06464e1.pdf [file d0nr06464e1.pdf]

# Supplementary results

## Stiffening of DU145 Prostate Cancer Cells Driven by Actin Filaments – Microtubules Crosstalk Conferring Resistance to Microtubule-Targeting Drugs

### Authors:

Andrzej Kubiak,<sup>a</sup> Matteo Chighizola,<sup>b</sup> Carsten Schulte,<sup>b</sup> Natalia Bryniarska,<sup>c</sup> Julita Wesołowska,<sup>d</sup> Maciej Pudełek,<sup>e</sup> Małgorzata Lasota,<sup>f</sup> Damian Ryszawy,<sup>e</sup> Agnieszka Basta-Kaim,<sup>c</sup> Piotr Laidler,<sup>f</sup> Alessandro Podestà,<sup>b\*</sup> and Małgorzata Lekka<sup>a\*</sup>

### Affiliations:

<sup>a</sup> Department of Biophysical Microstructures, Institute of Nuclear Physics, Polish Academy of Sciences, PL-31342 Kraków, Poland.

<sup>b</sup> C.I.Ma.I.Na. and Dipartimento di Fisica “Aldo Pontremoli”, Università degli Studi di Milano, via Celoria 16, 20133 Milano, Italy.

<sup>c</sup> Laboratory of Immunoendocrinology, Department of Experimental Neuroendocrinology, Maj Institute of Pharmacology, Polish Academy of Sciences, 12 Smętna St. 31-343 Kraków, Poland.

<sup>d</sup> Laboratory of in vivo and in vitro imaging, Department of Experimental Neuroendocrinology, Maj Institute of Pharmacology, Polish Academy of Sciences, 12 Smętna St. 31-343 Kraków, Poland.

<sup>e</sup> Department of Cell Biology, Faculty of Biochemistry, Biophysics, and Biotechnology, Jagiellonian University, Kraków, Poland.

<sup>f</sup> Chair of Medical Biochemistry Jagiellonian University Medical College, Kopernika 7, 31-034 Kraków, Poland.

Correspondence should be addressed to M.L. (Malgorzata.lekka@ifj.edu.pl) and AP (alessandro.podesta@mi.infn.it).

## Content of the supplementary information:

- ***Supplementary Note 1: Proliferation rate of DU145 cells treated with MTDs***
- ***Supplementary Note 2: Morphology of DU145 cell nucleus is affected by MTDs (Supplementary Figure S1; Supplementary Figure S3)***
- ***Supplementary Note 3: Migratory properties of DU145 cells (Supplementary Figure S3)***
- ***Supplementary Note 4: Time-dependent changes in mechanical properties of DU145 cells (Supplementary Table S1; Supplementary Figure S4)***
- ***Supplementary Note 5: Mapping the mechanical properties of cells***
- ***Supplementary Note 6. Finite-thickness correction (Supplementary Figure S5)***
- 
- ***Supplementary Note 7. Cross-sectional images of cytoskeleton around cell nucleus (Supplementary Figure S6)***
- ***Supplementary Note 8. Affecting the organization of actin filaments (Supplementary Figure S7, Supplementary Figure S8, Supplementary Figure 9)***

### ***Supplementary Note 1: Proliferation rate of DU145 cells treated with MTDs***

To estimate how fast the number of cells increases, a linear regression was applied to quantify roughly the proliferation rate (**Fig. 1**). Although for NTC cells, an exponential-like growth can be observed, the linear fit was chosen to avoid an exponential fit to three points. As expected, NTC cells had the highest proliferation rate, which was  $4300 \pm 1100$  cells per hour (Pearson's coefficient = 0.939). For low doses of drugs, i.e., 100 nM VFL, 1 nM DTX, and 0.1 nM COL, obtained rates were  $3000 \pm 270$  cells per hours (Pearson's coefficient = 0.992),  $2270 \pm 220$  cells per hour (Pearson's coefficient = 0.991) and  $3340 \pm 740$  cells per hour (Pearson's coefficient 0.954), respectively.

### ***Supplementary Note 2: Morphology of DU145 cell nucleus is affected by MTDs***

To investigate nuclear morphology fluorescence, microscopic images were analyzed in ImageJ with package Fiji and Cookbook with Particle Analysis. At least 5 images for each group for the following drugs concentrations: 100 nM and 750 nM for VFL, 1 nM and 5 nM for DTX, 0.1 nM and 0.5 nM for COL and control without addition of drug.

Although observed changes in microtubule organization correspond roughly with the results of cell viability, we wanted to verify the morphology of the cell nucleus (**Suppl. Fig. S1**). At large drug doses, regardless of the drug applied, cell nuclei were heavily irregular and defragmented, as one can see in the Hoechst stained fluorescent images (**Suppl. Fig. S1a**). To evaluate nuclear changes occurring at low doses, such as morphometric parameters as nuclear surface area and roundness were estimated (**Suppl. Fig. S1c&d**). Obtained fluorescent images showed large variations in the nucleus shape when low concentrations of MTDs are applied. In particular, for DTX treated cells, the circularity and roundness show the lowest values. For cells treated with COL and VFL, cell nuclei seem to be less affected by the MTDs action.

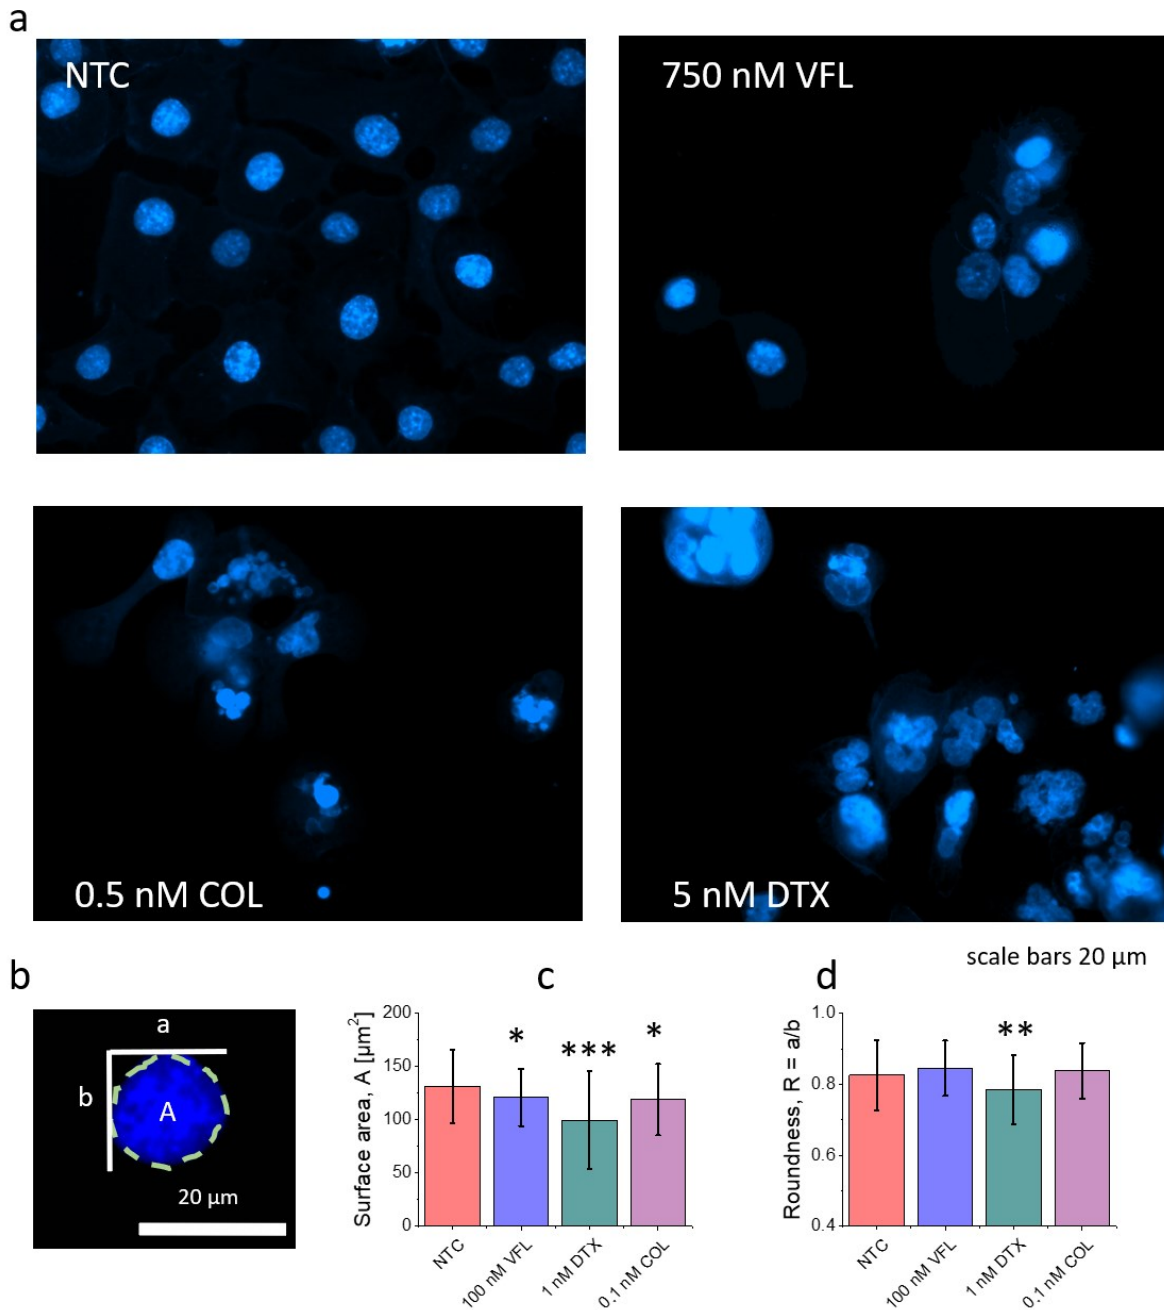

**Suppl. Figure S1.** Morphology of the cell nucleus is strongly affected by microtubule-targeted drugs. **a**, High concentrations of VFL, DTX, and CL induce fragmentation of cell nuclei, especially for DTX and COL. In low drug concentration, nucleus morphology is preserved (**b**), however, DTX seems to have a stronger effect on the nucleus, as shown in morphometric analysis of surface area (**c**) and roundness (**d**) for untreated and treated prostate DU145 cells. Data are presented as a mean  $\pm$  standard deviation calculated from  $n = 79$ -105 cells per condition.

Statistical significance was estimated by unpaired *t*-Student test at the level of 0.05 (\*  $p < 0.05$ , \*\*  $p < 0.01$ , \*\*\*  $p < 0.001$ ).

To evaluate whether it is possible to observe nuclear changes in the AFM measurements, such morphometric parameters as cell volume, surface, area and height were calculated based on the recorded images of DU145 cell clusters (Suppl. Fig.2).

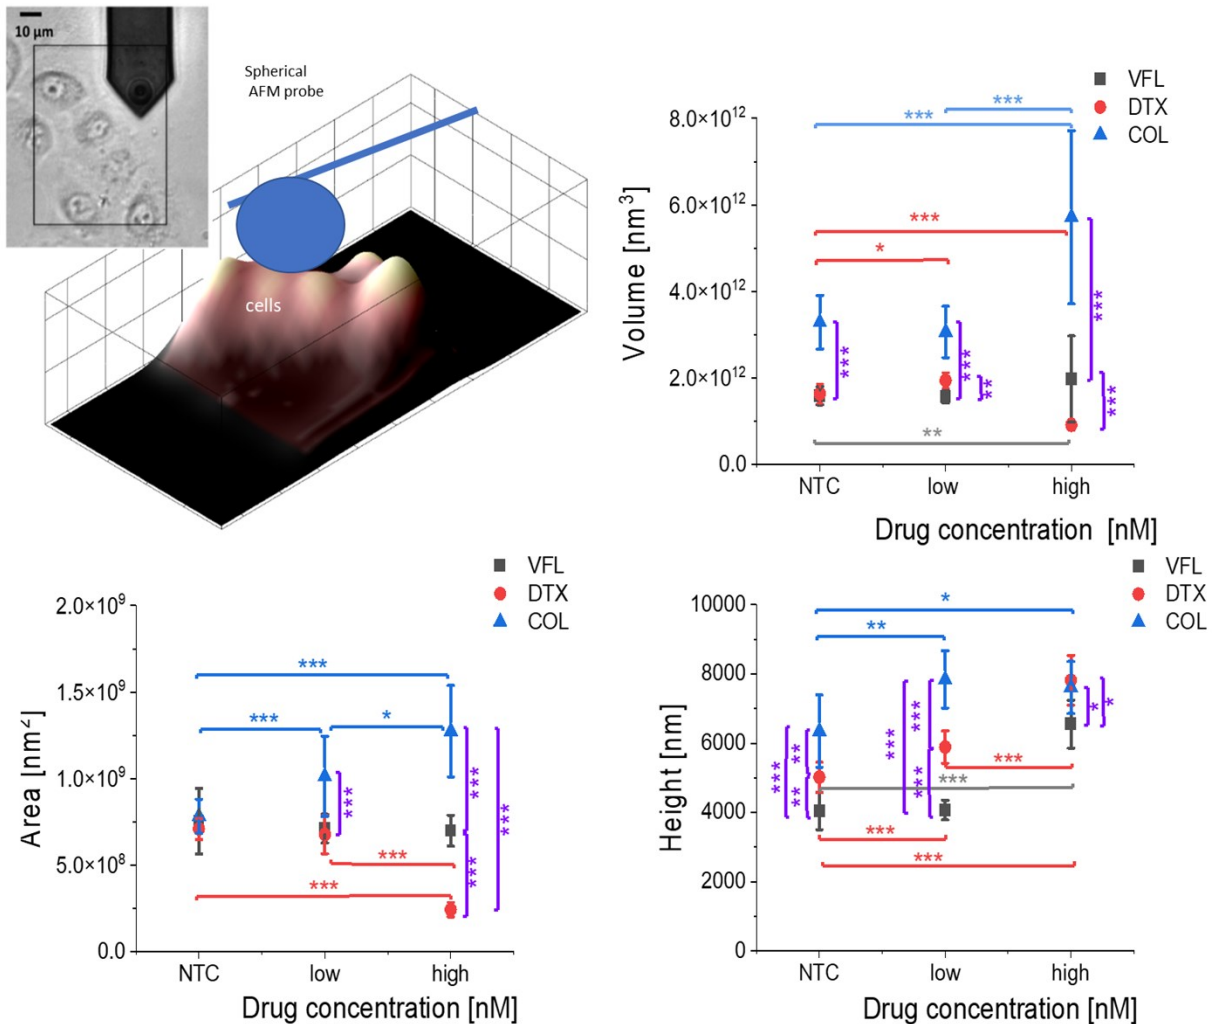

**Suppl. Figure S2. Cells change their morphology in response to MTDs.** AFM-based morphometric parameters of DU145 clusters showing alterations in clusters volume, surface area, and height induced by MTDs. Data are presented as a mean  $\pm \sigma_E$ ;  $n = 8-12$  per condition. Statistical significance was estimated by unpaired *t*-Student test at the level of 0.05 (\*  $p < 0.05$ , \*\*  $p < 0.01$ , \*\*\*  $p < 0.001$ ).

The obtained results show significant and opposing alterations of the cell volume and surface area for DTX (decrease) and COL (increase), especially for the high doses. Such observation, observed only in COL-treated cells, leads us to the conclusion that the swelling of cells treated with a high concentration of drugs is characteristic of microtubule-disrupting agents. The height of the analyzed cell clusters shows an increasing trend for all MTDs, although significant observations were unique for high drug concentrations. Interestingly, in the low-dose (100 nM) VFL case, for which pronounced deformability changes were recorded, volume, surface area, and height of cells remained at the same level as the NTC cells. Thus, indicating cytoskeleton contribution in mechanical features changes of 100 nM, VFL treated cells, rather than changes in their dimensions.

***Supplementary Note 3: Migratory properties of DU145 cells***

DU145 cells were incubated with the corresponding MTD drug. Their motility was estimated immediately after drug administration. The cancer cells' movement was recorded using a time-lapse Leica DMI6000B videomicroscopy system equipped with a temperature chamber (37°C, 5% CO<sub>2</sub>), interference modulation contrast (IMC) optics, and a cooled, digital DFC360FX CCD camera.<sup>1</sup> Cell trajectories were recorded and used to calculate the cell displacement and speed (**Suppl. Fig. 3**).

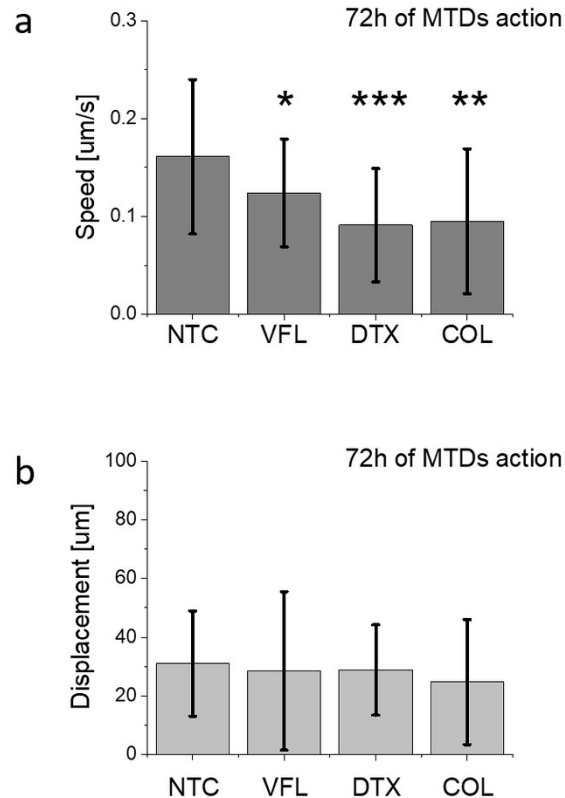

**Suppl. Figure S3. Migratory properties of DU145 cells upon MTDs treatment.** An average value of the (a) migration speed and (b) displacement was determined for cells treated with VFL, DTX, and COL. Data are presented as a mean  $\pm$  standard deviation;  $n = 30$  cells per condition. Statistical significance was estimated by unpaired  $t$ -Student test at the level of 0.05 (\*  $p < 0.05$ , \*\*  $p < 0.01$ , \*\*\*  $p < 0.001$ ).

#### **Supplementary Note 4: Time-dependent changes in mechanical properties of DU145 cells**

To measure the mechanical properties of DU145 cells, cells were seeded on glass coverslips ( $\text{\O} = 25$  mm) immersed in a Petri dish with internal  $\text{\O} = 34$  mm (TPP) at the density of 50 000/ml. Measurements were carried out using atomic force microscopes: model Xe120 (Park Systems) and working in a force spectroscopy mode. A rectangular cantilever ORC8 (Bruker) with a nominal spring constant of 0.05 N/m, the opening angle of  $36 \pm 2^\circ$ , and a radius of 15 nm were used. Cantilever spring constants were calibrated by the use of the thermal noise method<sup>2</sup>. For measurements, coverslips with cells were mounted in a transparent liquid cell and kept at room

temperature in the standard culture medium. Room temperature was not significantly harmful for Du145 during experiments, which lasted up to 2 hours<sup>3</sup>. Keeping a temperature below 37°C reduces the cell motility, which was beneficial for the elasticity measurements. 25 force curves were acquired within an elasticity map of  $5 \times 5$  points with a pixel size of  $1 \mu\text{m}^2$ , load force  $\sim 10$  nN, and tip velocity of  $8 \mu\text{m/s}$ . Each experiment was conducted in triplicate.

The relative Young's modulus variations, calculated as  $\Delta E_{rel} = (E_{drug} - E_{NTC})/E_{NTC}$ , are reported in **Suppl. Table S1 and Suppl. Fig. S4**. In our analysis, the maximum indentation was 500 nm. The final Young's modulus was calculated as the mean  $\pm$  standard error (s.e.) from  $n = 80-96$  cells measured for each group separately (**Suppl. Table S1**).



Suppl. Table S1. Young's modulus obtained for MTDs treated DU145 cells (s.e. – standard error, n – number of cells measured; p-value was calculated using two tails unpaired Student t-test). The relative Young's modulus variations are reported in both, Fig. 4 and Suppl. Fig. S4.

| <b>time</b><br><b>MTDs</b><br><b>treatment</b> | <b>24h</b><br><i>E ± s.e. (n) [kPa]</i> | <b>48h</b><br><i>E ± s.e. (n) [kPa]</i> | <b>72h</b><br><i>E ± s.e. (n) [kPa]</i> |
|------------------------------------------------|-----------------------------------------|-----------------------------------------|-----------------------------------------|
| <b>Vinflunine (VFL)</b>                        |                                         |                                         |                                         |
| <b>NTC</b>                                     | 3.1 ± 0.2 (94)                          | 2.2 ± 0.1 (93)                          | 1.5 ± 0.1 (96)                          |
| <b>100 nM VFL</b>                              | 3.1 ± 0.3 (94)<br><i>p = 0.9512</i>     | 2.3 ± 0.2 (60)<br><i>p = 0.632</i>      | 1.9 ± 0.1 (93)<br><i>p = 0.0016</i>     |
| <b>750 nM VFL</b>                              | 3.0 ± 0.2 (76)<br><i>p = 0.7147</i>     | 2.7 ± 0.2 (88)<br><i>p = 0.0412</i>     | 2.5 ± 0.2 (91)<br><i>p = 0.0001</i>     |
| <b>Docetaxel (DTX)</b>                         |                                         |                                         |                                         |
| <b>NTC</b>                                     | 4.2 ± 0.3 (88)                          | 2.9 ± 0.2 (88)                          | 2.6 ± 0.1 (89)                          |
| <b>1 nM DTX</b>                                | 4.7 ± 0.4 (86)<br><i>p = 0.3610</i>     | 4.8 ± 0.4 (83)<br><i>p = 0.0001</i>     | 2.8 ± 0.2 (89)<br><i>p = 2977</i>       |
| <b>5 nM DTX</b>                                | 4.4 ± 0.4 (83)<br><i>p = 0.7280</i>     | 3.4 ± 0.3 (86)<br><i>p = 0.1085</i>     | 2.8 ± 0.1 (87)<br><i>p = 0.2971</i>     |
| <b>Colchicine (COL)</b>                        |                                         |                                         |                                         |
| <b>NTC</b>                                     | 3.3 ± 0.17 (90)                         | 3.0 ± 0.15 (91)                         | 2.2 ± 0.1 (90)                          |
| <b>0.1 nM COL</b>                              | 4.4 ± 0.3 (88)<br><i>p = 0.0012</i>     | 2.9 ± 0.2 (86)<br><i>p = 0.7853</i>     | 2.3 ± 0.1 (87)<br><i>p = 0.4623</i>     |
| <b>0.5 nM COL</b>                              | 3.3 ± 0.2 (87)<br><i>p = 0.9140</i>     | 2.0 ± 0.1 (88)<br><i>p = 0.0001</i>     | 2.0 ± 0.2 (88)<br><i>p = 0.2520</i>     |

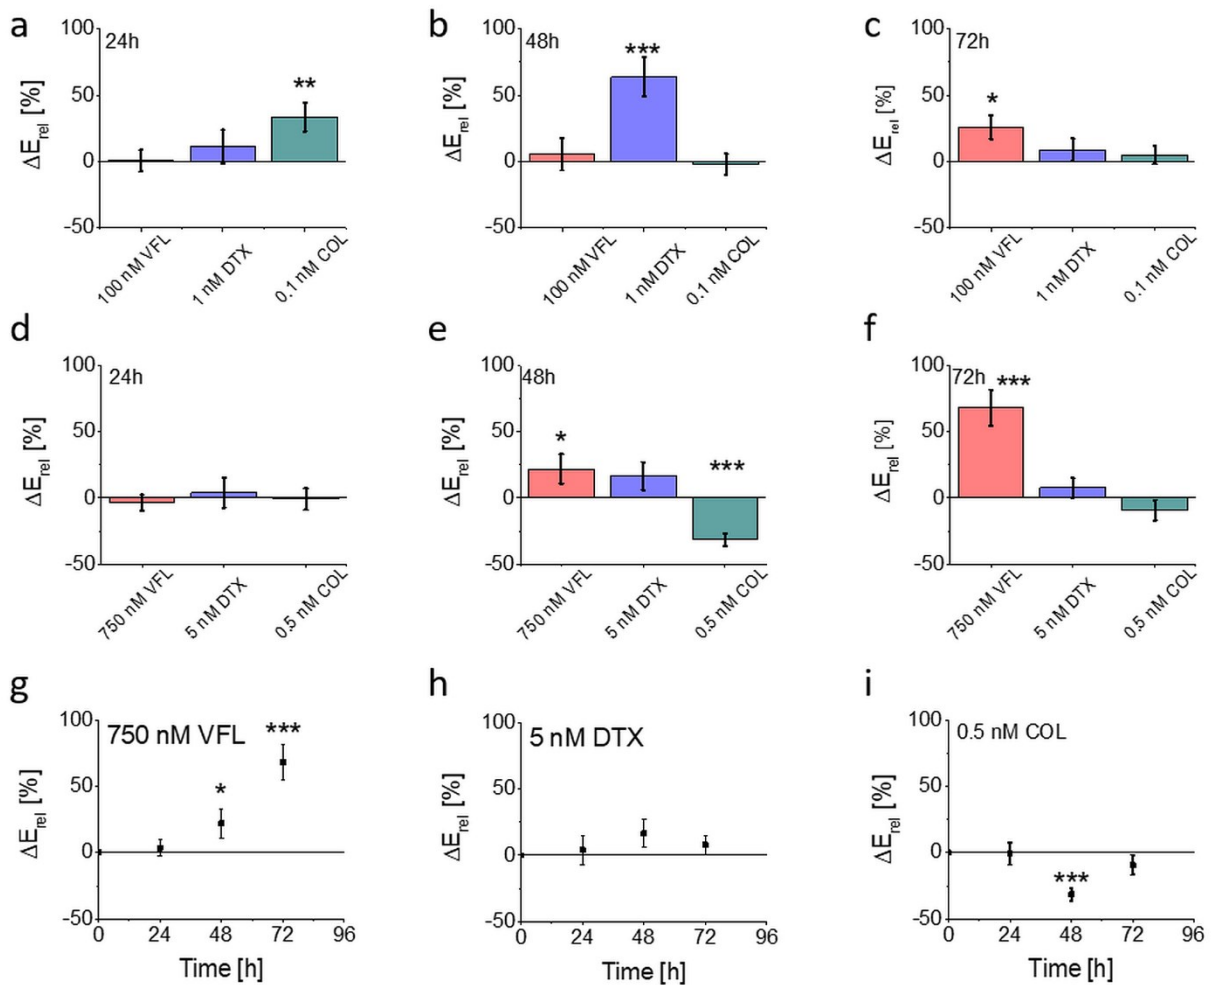

**Suppl. Figure S4.** Relative change  $\Delta E_{rel}$  of the Young's modulus measured at the same time-point for low (a-c) and high (d-f) MTDs doses. (g-i) Time-dependent  $\Delta E_{rel}$  changes showing cell stiffening or softening dependently of the MT drug, concentration, and time applied. Error bars were calculated using the error propagation method. Statistical significance was estimated by unpaired t-Student test at the level of 0.05 (\*  $p < 0.05$ ; \*\*  $p < 0.01$ ).

### Supplementary Note 5: Mapping the mechanical properties of cells: combined topographical and mechanical mapping

For acquiring maps of mechanical properties, DU145 cells were plated in the standard experimental conditions on  $\varnothing = 40$  mm glass-bottom dishes for cell culture (Willco Wells, Amsterdam, Netherlands). Cells were maintained in DMEM without phenol red but supplemented

with 10% heat-inactivated FBS and 5 nM L-glutamate. Glass coverslips with cells were mounted in transparent liquid cell and kept at room temperature in standard culture medium.

Combined topographical and mechanical imaging was performed using a Bioscope Catalyst AFM (Bruker). During the AFM measurements, the temperature of the medium was maintained at 30°C using a perfusion stage incubator and a temperature controller (Lakeshore 3301, Ohio, USA). The choice of the temperature below 37°C was made to decrease the cellular metabolism, which slows down also the cell motility, making it possible to acquire large maps without disturbance due to strong movements of the cells during the measurements (acquisition of one map takes 30-40 min).

We used custom monolithic borosilicate glass probes consisting of spherical glass beads with radii  $R$  in the range 4500–5500 nm, attached to ultra-soft silicon, tipless cantilevers (Micromash HQ:CSC38/tipless/no Al) with elastic constant  $k = 0.02–0.03$  N/m, measured using the thermal noise calibration<sup>4</sup>. Probes were fabricated and calibrated, in terms of tip radius, according to an established custom protocol<sup>5</sup>.

The topographical/mechanical maps were obtained, as described elsewhere<sup>6</sup>, from sets of force curves, collected in Point and Shoot (P&S) mode, selecting the regions of interest from optical images, exploiting the accurate alignment of the optical and AFM images obtained using the Miro software module integrated in the AFM software. Each set of force curves consisted of an  $N \times M$  array of curves spatially separated by approximately 1.5  $\mu\text{m}$ , each force curve containing 4096 points, with ramp length  $L = 6$   $\mu\text{m}$ , maximum load  $F_{max} = 10$  nN, ramp frequency  $f = 1$  Hz. Typical maximum indentation was 2-3  $\mu\text{m}$ , larger than in the case of sharp pyramidal probes (max. indentation 500 nm).

Suppl. Table S2. Young's modulus obtained for MTDs treated DU145 cells showing the mean value of the median  $E$  extracted per each cluster; error represents the final error  $\sigma_E$  that take into account the three main errors: the instrumental error  $\sigma_{inst}$ , the error associated to one single cluster median value  $\sigma_{med}$  and the deviation of the all clusters  $\sigma_{mean}$ ,  $n$  – number of cell clusters measured;  $p$ -value was calculated using the two-tails unpair Student  $t$ -test.

|                                | <b>VFL</b>                        | <b>DTX</b>                        | <b>COL</b>                        |
|--------------------------------|-----------------------------------|-----------------------------------|-----------------------------------|
| <b>whole-cell</b>              | $E \pm \sigma_E [Pa]$             | $E \pm \sigma_E [Pa]$             | $E \pm \sigma_E [Pa]$             |
| <b>NTC</b>                     | 375.1 ± 23.2 (8)                  | 429.0 ± 35.9 (11)                 | 376.6 ± 37.6 (9)                  |
| <b>low</b>                     | 444.61 ± 24.4 (8)<br>$p = 0.0058$ | 407.9 ± 34.3 (12)<br>$p = 0.6759$ | 360.6 ± 79.6 (8)<br>$p = 0.8528$  |
| <b>high</b>                    | 447.1 ± 29.8 (7)<br>$p = 0.0755$  | 336.6 ± 25.5 (12)<br>$p = 0.0456$ | 436.8 ± 132.1 (7)<br>$p = 0.6321$ |
| <b>nuclear region (5-15%)</b>  |                                   |                                   |                                   |
| <b>NTC</b>                     | 346.6 ± 19.8 (8)                  | 410.8 ± 32.7 (11)                 | 422.9 ± 43.6 (9)                  |
| <b>low</b>                     | 466.5 ± 36.9 (8)<br>$p = 0.0125$  | 388.3 ± 41.0 (12)<br>$p = 0.6760$ | 470.5 ± 99.2 (8)<br>$p = 0.6536$  |
| <b>high</b>                    | 539.0 ± 44.9 (7)<br>$p = 0.0012$  | 394.4 ± 33.6 (12)<br>$p = 0.7296$ | 628.4 ± 167.9 (7)<br>$p = 0.2054$ |
| <b>nuclear region (20-40%)</b> |                                   |                                   |                                   |
| <b>NTC</b>                     | 381.9 ± 13.2 (8)                  | 378.7 ± 24.3 (11)                 | 429.0 ± 38.2 (9)                  |
| <b>low</b>                     | 488.9 ± 22.7 (8)<br>$p = 0.011$   | 341.8 ± 25.5 (12)<br>$p = 0.3093$ | 486.1 ± 60.6 (8)<br>$p = 0.4271$  |
| <b>high</b>                    | 537.6 ± 44.8 (7)<br>$p = 0.0037$  | 340.0 ± 16.5 (12)<br>$p = 0.1957$ | 642 ± 107 (7)<br>$p = 0.0584$     |
| <b>cell periphery</b>          |                                   |                                   |                                   |
| <b>NTC</b>                     | 397.3 ± 29.9 (8)                  | 401.4 ± 27.6 (11)                 | 376.8 ± 35.9 (9)                  |
| <b>low</b>                     | 437.5 ± 24.2 (8)<br>$p = 0.3139$  | 403.4 ± 23.1 (12)<br>$p = 0.9544$ | 388.5 ± 79.3 (8)<br>$p = 0.8905$  |
| <b>high</b>                    | 398.3 ± 41.7 (7)<br>$p = 0.9841$  | 321.1 ± 24.8 (12)<br>$p = 0.0416$ | 536 ± 152 (7)<br>$p = 0.2702$     |

### ***Supplementary Note 6. Finite-thickness correction***

To overcome issues linked to the influence of the underlying stiff support on the mechanical properties of cells, finite thickness correction was applied to the obtained data shown in **Fig. 6** and in **Suppl. Fig. S5**.

The finite-thickness correction is needed when the requirement that the sample thickness is much larger than the maximum indentation ( $h \gg \delta$ ) is not satisfied. When indenting very compliant cells, with maximum indentation  $\delta$  well beyond 1  $\mu\text{m}$ , the finite-thickness effect must be accounted for. In this condition, the influence of the rigid substrate (the bottom of the glass dish from Wilco Weels®) makes the elastic cell response stiffer, i.e., the measured Young's modulus is larger. This effect increases when the sample becomes even thinner, like in the peripheral regions of the cell body. As a rule of thumb, the condition  $10-15 \delta < h$  should be satisfied to neglect finite-thickness effects, although the incidence of finite thickness also depends on the indenter's radius (see below). It turns out that this effect is actually stronger for large colloidal probes, while it is usually negligible for sharp AFM tips.

We implemented the analytic correction developed by Dimitriadis *et al.*<sup>7</sup> for spherical probes, as described by Puricelli *et al.*<sup>6</sup>. Since cells adhere to the substrates using highly dynamical focal adhesion complexes, following the advice of Gavara and Chadwick<sup>8</sup>, we used a correction factor to the Hertz equation, which represents an average between the two conditions of perfectly adherent and non-adherent cells:

$$F = \frac{9}{16} ER^{\frac{1}{2}} \delta^{\frac{3}{2}} [1 + 1.009\chi + 1.032\chi^2 + 0.578\chi^3 + 0.051\chi^4]$$

This is the effective equation for the correction of the finite-thickness effect. Defining  $\Delta(\chi) \equiv \Delta(\chi(R, \delta, h))$ , with

$$\Delta = 1 + 1.009\chi + 1.032\chi^2 + 0.578\chi^3 + 0.051\chi^4,$$

the finite-thickness corrected Hertz Model can be written as:

$$\frac{F}{\Delta(\chi)} = \frac{9}{16} ER^{\frac{1}{2}} \delta^{\frac{3}{2}}$$

The variable  $\chi = \frac{\sqrt{R\delta}}{h}$  combines the three critical lengths of the system, the radius of the probe  $R$ , the indentation  $\delta$  and the height of the sample  $h$ . Considering that for the Hertz model, the contact

area between the probe and the sample is  $a = \sqrt{R\delta}$ , we have  $\chi = \frac{a}{h}$ , meaning that the finite-thickness effect does not depend directly on the ratio of the vertical lengths  $\delta$  and  $h$ , but rather on the ratio of the horizontal dimension of the contact area, i.e. the contact radius  $a$ , to the sample height  $h$ . As a consequence, for a given indentation  $\delta$ , the finite-thickness effects will be significantly stronger for the colloidal probes, compared to the sharp ones.

An example of the effects of the finite-thickness correction is shown in **Suppl. Fig. S5**. The value of the Young's modulus extracted from each force curve is plotted as a function of the local cell height for three different representative clusters of cells (control conditions), measured in a single day. Data are shown without (**Suppl. Fig. S5a**), or with (**Suppl. Fig. S5b**), the finite-thickness correction.

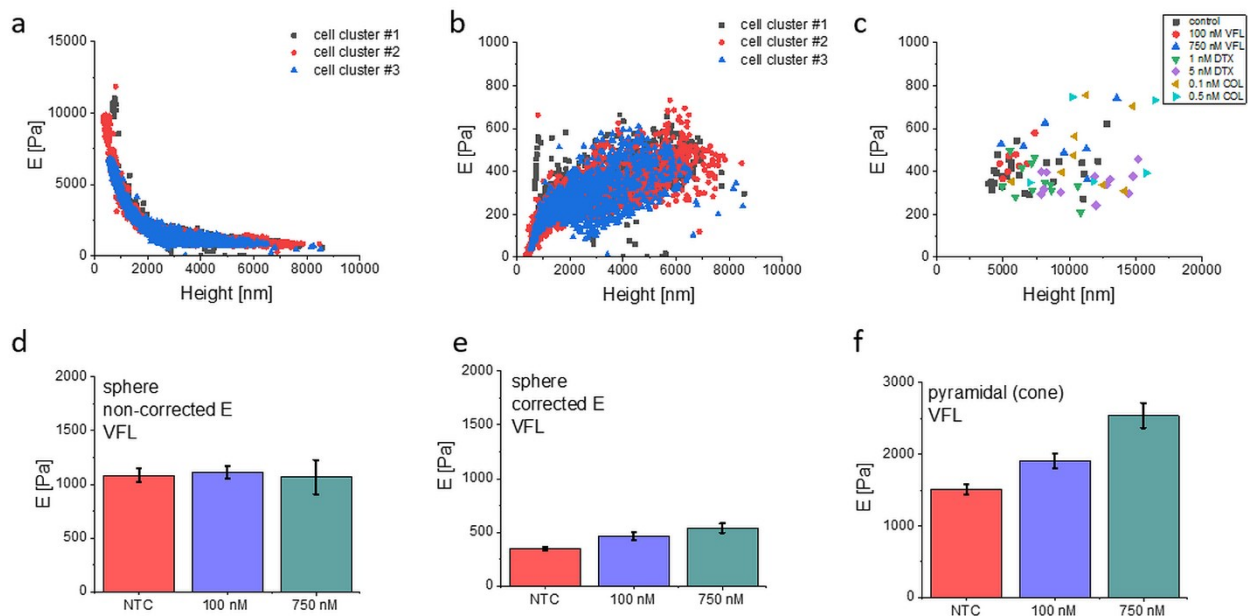

**Suppl. Figure S5.** Finite thickness correction for colloidal probes based on Dimitriadis et al. Data are presented as Young's modulus extracted from single force curves, coming from three clusters of cells of the control condition, using (a) standard Hertz model and (b) the finite -thickness corrected Hertz model. (c) Young's modulus median value of single-cell clusters ( $E_{md}$ , see

*Materials and Methods*). (d-e) median Young's modulus  $\pm \sigma_E$ ;  $n = 3$  clusters per condition. (f) mean Young's modulus  $\pm$  standard error;  $n = 76-94$  cells per condition.

To verify that the results of the mechanical analysis are not affected by the change in the height of the cells inside the clusters (for example, the thickening of cells could determine a loss of sensitivity to the inner region of the cells, for the same maximum indentation, or to a redistribution of organelles in the cytoplasmic region), we plotted the median of Young's modulus from the inner cells body (nuclear region, deep indentation) of each cluster versus the mean cluster height (**Suppl. Fig. S5c**). There is no evidence of any correlation between the height of the cluster or the cell and Young's modulus, which led us to exclude that our analysis is significantly biased by the morphological changes of the cells. It is clear from the comparison of **Suppl. Fig. S5a and S5b** that the measured Young's modulus increases as the cell height decreases, leading to severe overestimation of the intrinsic (effective) value of a cell modulus. In our experimental conditions, only with cell heights of approximately 20-30  $\mu\text{m}$  would make the finite-thickness effect negligible.

The effect of the rigid substrate underneath the cells is to hide the fine mechanical modifications that take place inside the cells body upon the action of the drug, resulting in a loss of sensitivity. Since we have shown that the morphological properties, particularly the height of the cells, change upon the treatment with the drugs, the application of the finite-thickness correction and with pyramidal probes is important to compare results obtained at different drug concentrations. This is shown in **Suppl. Fig. S5d-f**, where the results obtained with VFL with and without the finite-thickness correction are shown. Without the correction, apart from a rigid shift to higher Young's modulus, the differences between the three conditions are lost; with the application of the correction, instead, the differences are evident, and the same trend is observed as with the pyramidal probes.

***Supplementary Note 7. Cross-sectional images of cytoskeleton around the cell nucleus.***

To examine the localization of MT and actin filaments around the cell nucleus of MTD-treated DU145 cells, confocal images of a slice recorded at the height of 3.6  $\mu\text{m}$  were compared (**Suppl. Fig. S6**)

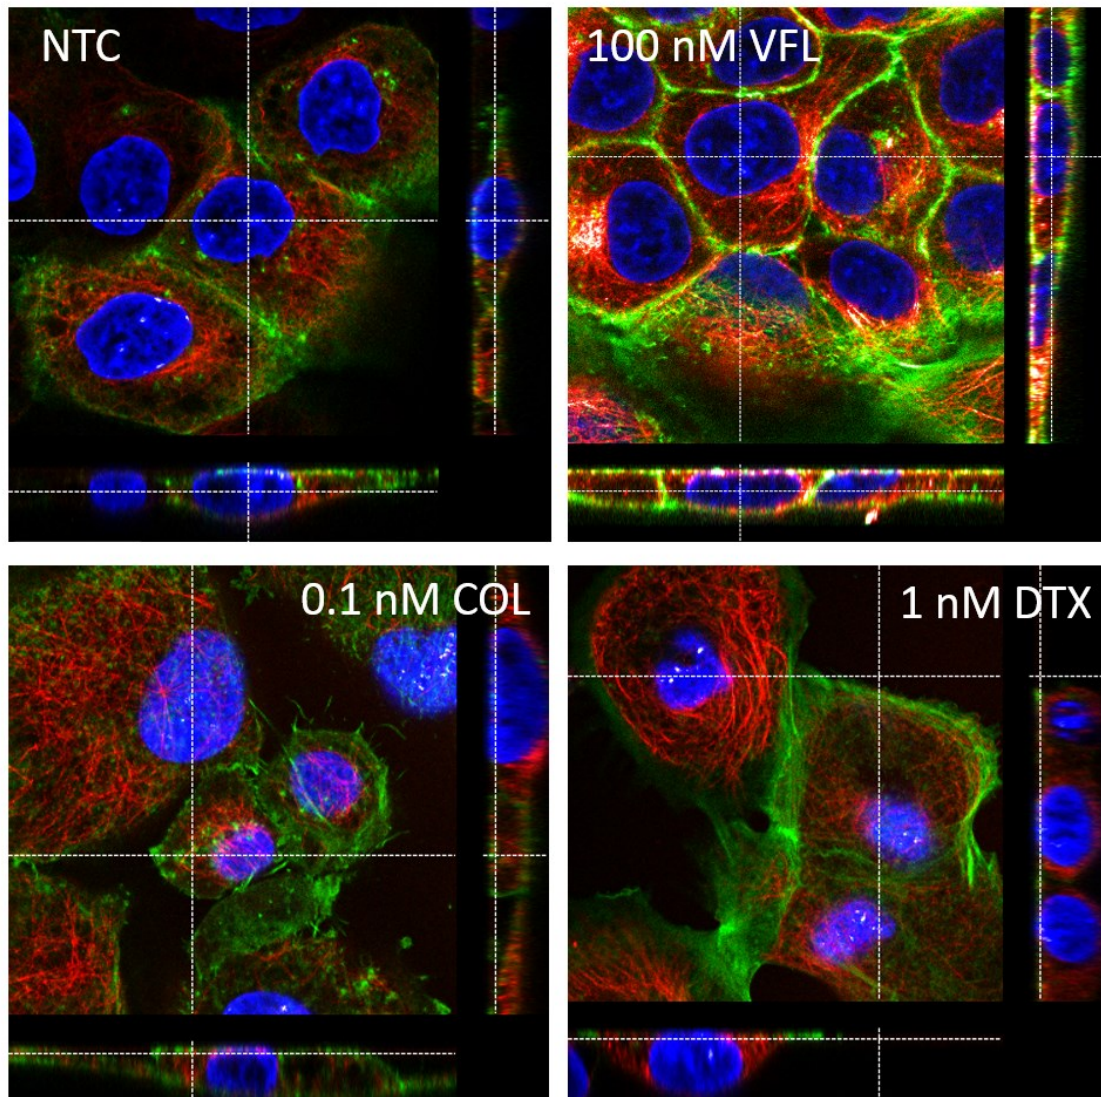

**Suppl. Figure S6.** Cross-sections through cell nuclei (in blue) of the MTD-treated DU145 cells. In VFL-treated cells, the actin filaments (in green) dominated, while for other cases, the MT (in red) presence was more pronounced.

**Supplementary Note 8. Affecting the organization of actin filaments**

To depolymerize the actin filaments, cells were treated with 20  $\mu$ M cytochalasin D (cyto D) added to cell culture for 30 minutes. In the case of MTD-treated cells, cyto D was applied after cells' treatment with the corresponding MTD drug. Cell viability assays, confocal microscopy were applied as described in the *Materials and Methods*.



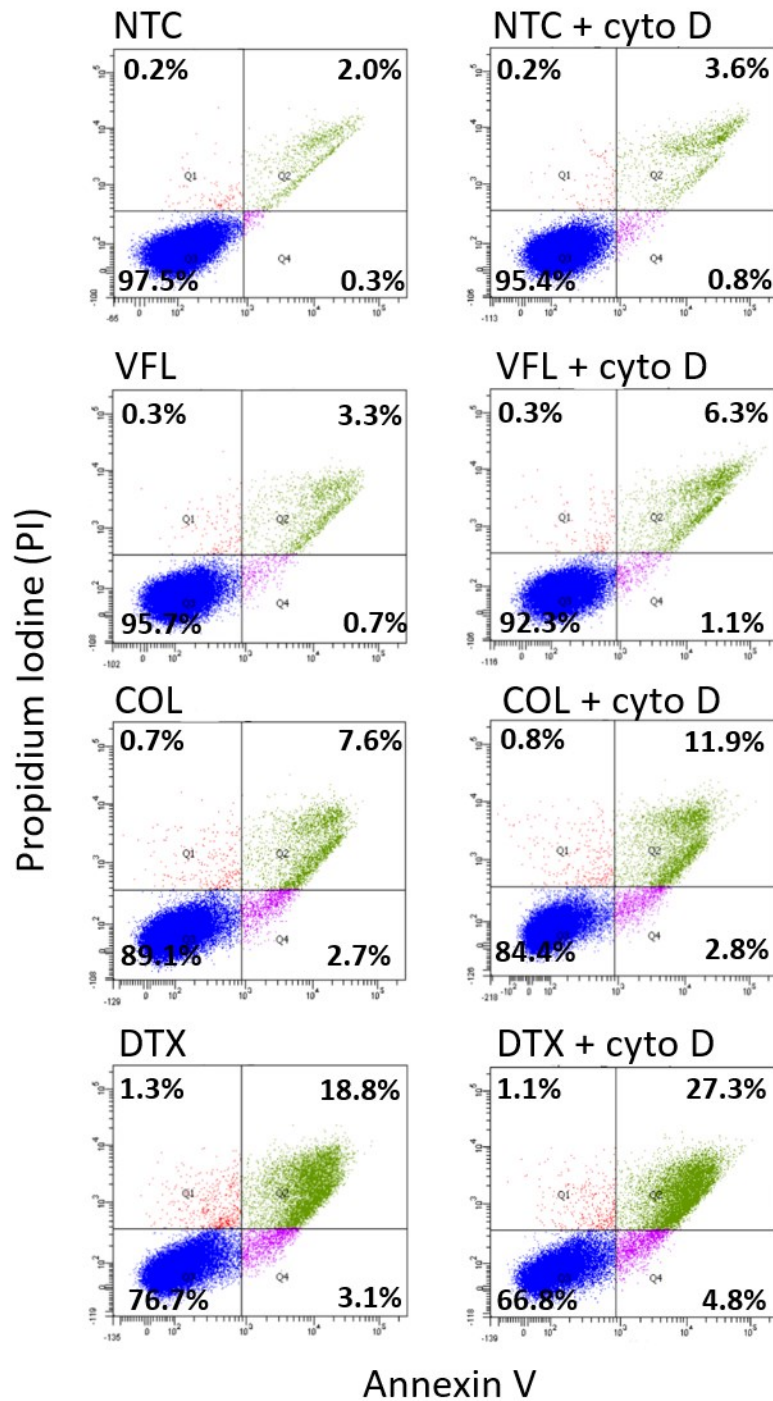

**Suppl. Figure S7.** Induction of cell death in cytochalasin D treated cells. (Left panel) The number of dead DUI45 cells increased depending on the MTDs drugs (VFL, Col, DTX) compared to NTC cells. (Right panel) A more pronounced increase of the cell death followed by the incubation with 20  $\mu$ M cytochalasin D for 30 minutes.

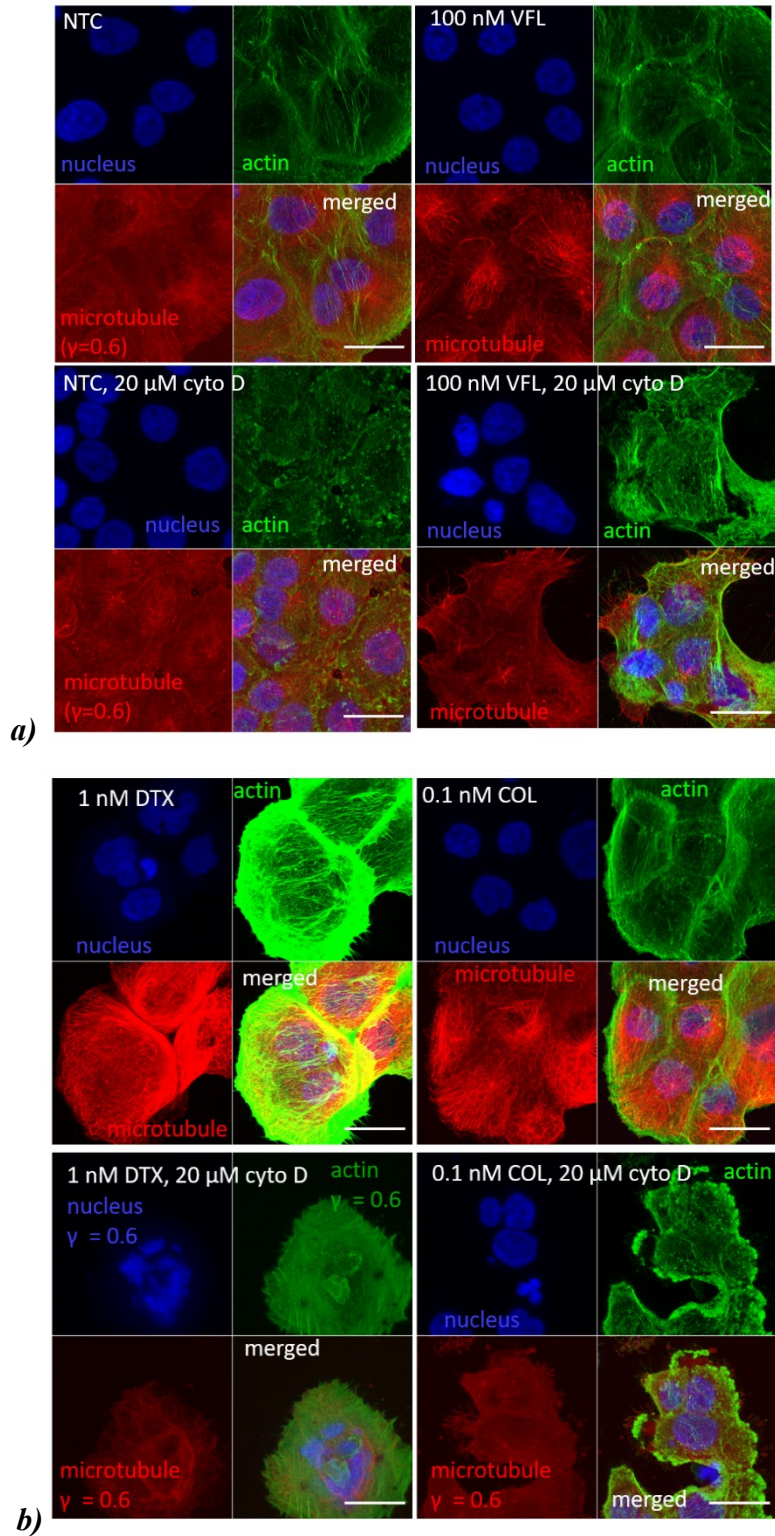

**Suppl. Figure S8.** Confocal images recorded at the same conditions showing the effect of 20  $\mu$ M cytochalasin D on DU145 cells. Scale bar 25  $\mu$ m.

To check the actin filaments' organization over the cell nucleus, the cross-section from the highest Z-stack position was prepared after analyzing a whole group of the recorded Z-stacks (Suppl. Fig. S9).

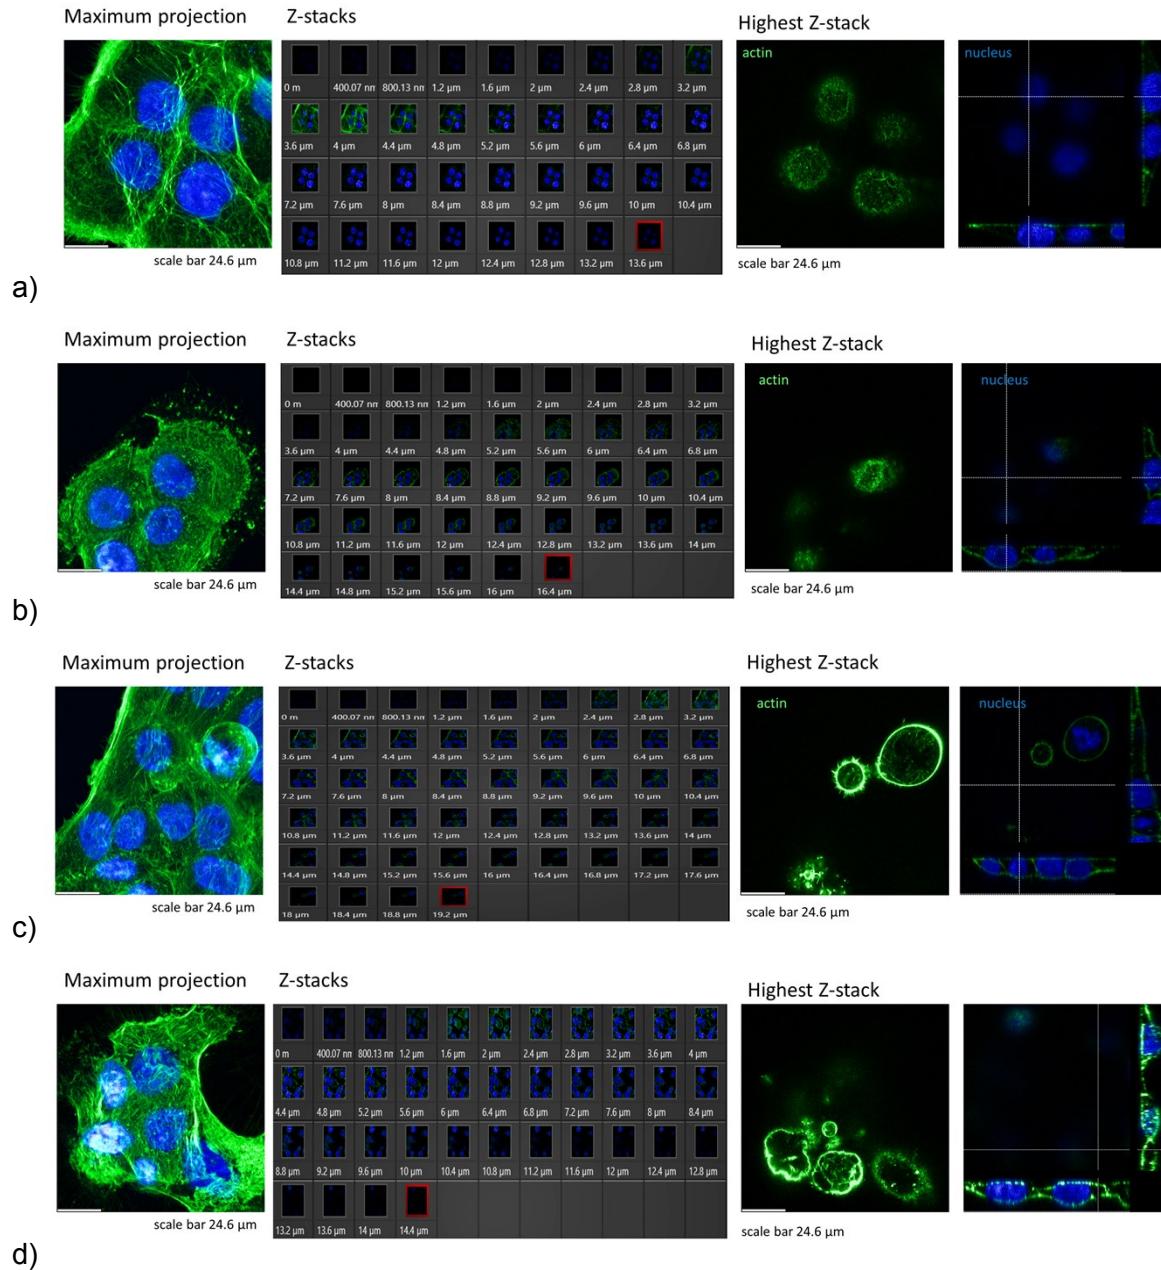

**Suppl. Figure S9.** Fluorescent images of actin filaments (in green) and cell nuclei (in blue) showing a maximum intensity projection, all recorded Z-stacks, the F-actin organization, and cross-sections through cell nuclei for the highest Z-stack position (marked with red square in the Z-stacks collection). (a) NTC DU145 cells, (b) NTC treated with 20 μM cytochalasin D, (c) VFL-treated DU145 cells, (d) VFL-treated cells after cytochalasin D (20 μM).

## References:

1. Luty, M. *et al.* Fenofibrate augments the sensitivity of drug-resistant prostate cancer cells to docetaxel. *Cancers (Basel)*. **11**, (2019).
2. Butt, H. J. & Jaschke, M. Calculation of thermal noise in atomic force microscopy. *Nanotechnology* **6**, 1–7 (1995).
3. Lekka, M. *et al.* Elasticity of normal and cancerous human bladder cells studied by scanning force microscopy. *Eur. Biophys. J.* **28**, 312–316 (1999).
4. Butt, H. J., Cappella, B. & Kappl, M. Force measurements with the atomic force microscope: Technique, interpretation and applications. *Surface Science Reports* **59**, 1–152 (2005).
5. Indrieri, M., Podestà, A., Bongiorno, G., Marchesi, D. & Milani, P. Adhesive-free colloidal probes for nanoscale force measurements: Production and characterization. *Rev. Sci. Instrum.* **82**, (2011).
6. Puricelli, L., Galluzzi, M., Schulte, C., Podestà, A. & Milani, P. Nanomechanical and topographical imaging of living cells by atomic force microscopy with colloidal probes. *Rev. Sci. Instrum.* **86**, 033705 (2015).
7. Dimitriadis, E. K., Horkay, F., Maresca, J., Kachar, B. & Chadwick, R. S. Determination of elastic moduli of thin layers of soft material using the atomic force microscope. *Biophys. J.* **82**, 2798–2810 (2002).
8. Gavara, N. & Chadwick, R. S. Determination of the elastic moduli of thin samples and adherent cells using conical atomic force microscope tips. *Nat. Nanotechnol.* **7**, 733–736 (2012).
